# Supplementary material for: Unconventional Pro-inflammatory CD4+ T Cell Response in B Cell-Deficient Mice Infected with Trypanosoma cruzi
Source: PubMed Central journal article supplement (PMC5702327; doi:10.3389/fimmu.2017.01548), 2017-11-21
Supplement: data_sheet_1.pdf [file data_sheet_1.pdf]

## Supplementary Material

### Unconventional pro-inflammatory CD4<sup>+</sup> T cell response in B cell deficient mice infected with *Trypanosoma cruzi*

Melisa Gorosito Serrán<sup>1</sup>, Jimena Tosello Boari<sup>1</sup>, Facundo Fiocca Vernengo<sup>1</sup>, Cristian G Beccaría<sup>1#</sup>, María C Ramello<sup>1#</sup>, Daniela A Bermejo<sup>1</sup>, **Amelia G Cook<sup>2</sup>**, **Carola G Vinuesa<sup>2</sup>**, Carolina L Montes<sup>1</sup>, Eva V Acosta Rodriguez<sup>1</sup>, Adriana Gruppi<sup>1\*</sup>.

<sup>1</sup>Centro de Investigaciones en Bioquímica Clínica e Inmunología (CIBICI - CONICET), Departamento de Bioquímica Clínica, Facultad de Ciencias Químicas, Universidad Nacional de Córdoba, Córdoba, Argentina.

<sup>2</sup>Dept of Immunology and Infectious Disease, John Curtin School of Medical Research, Australian National University, Canberra, Australia.

\* **Correspondence:** Corresponding Author: Dr Adriana Gruppi. agruppi@fcq.unc.edu.ar

#### 1 Supplementary Figures and Tables

##### 1.1 Supplementary Figure 1

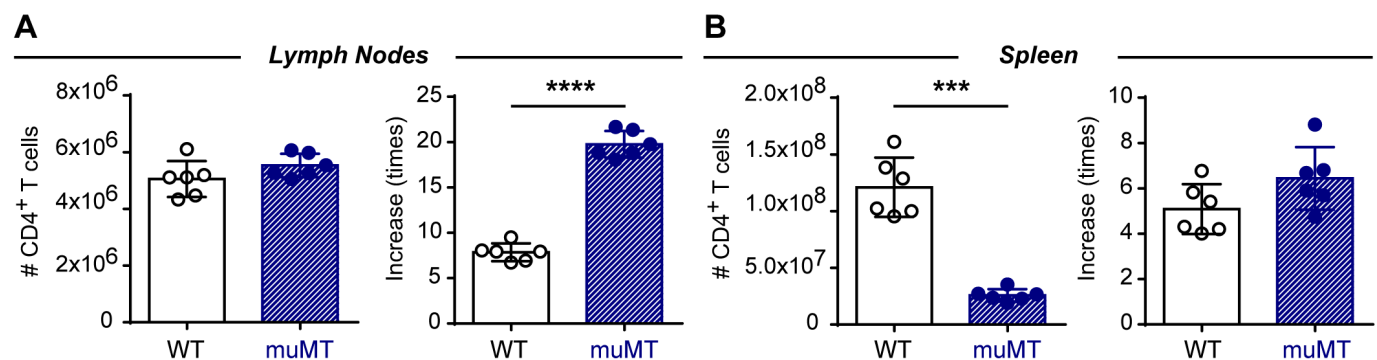

#### Supplementary Figure 1: Number of CD4<sup>+</sup>T cells in *T. cruzi* infected WT and muMT mice.

WT (n=6, white bars) and muMT (n=6, blue bars) mice were infected with 10000 trypomastigotes of *T. cruzi* Y strain. At 15 Dpi, lymph nodes and spleen were obtained. Cells were counted in Neubauer chamber and stained with fluorochrome labelled anti-CD3 plus anti-CD4 and processed for flow cytometry. Graphics show the number of CD4<sup>+</sup> T cells at 15 Dpi and the increase of CD4<sup>+</sup>T cell number in infected mice respect to non-infected mice in lymph nodes (A) and in the spleen (B).

## 1.2 Supplementary Figure 2

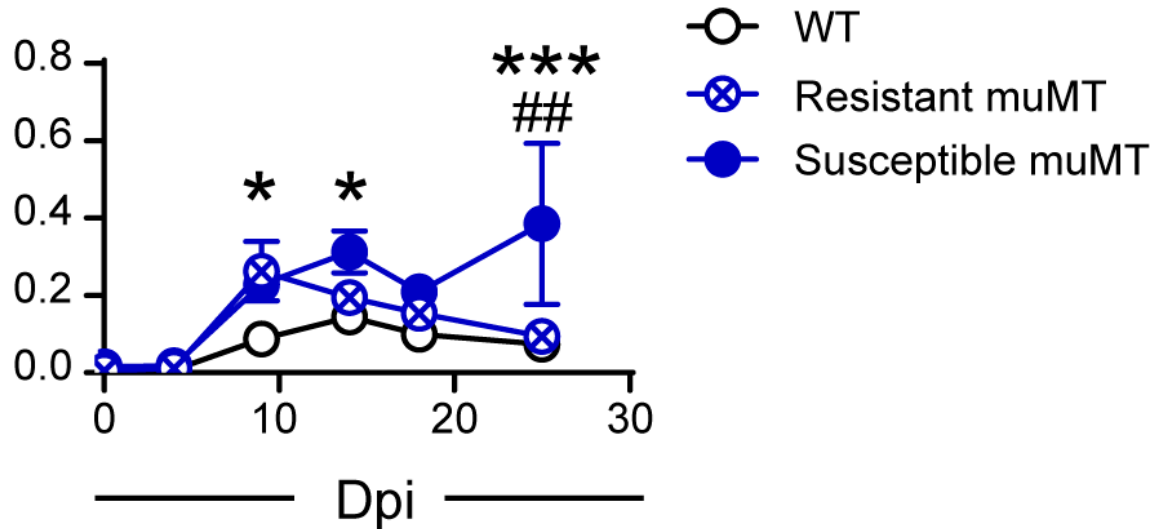

**Supplementary Figure 2: Link between high plasma concentration of TNF and occurrence of death in *T. cruzi* infected muMT mice**

WT (n=9, empty circles) and muMT (n=13) mice were infected with 10000 trypomastigotes of *T. cruzi* Y strain. Mice were identified and blood samples were obtained at different times post infection. By the end of the experiment (Day 40pi), each infected muMT mouse were differentiated between susceptible (n=9, blue circles) or Resistant (n=4, blue crossed circles), considering whether the mouse had died or not during the experiment. TNF was quantified in plasma samples of each infected muMT sub-group and WT mice by ELISA. The graph shows concentrations of TNF in plasma at different Dpi. Two way Anova with Bonferroni post-test \* comparison between Susceptible muMT and WT, # comparison between Susceptible muMT and Resistant muMT. Experiment representative of two.

### 1.3 Supplementary Figure 3

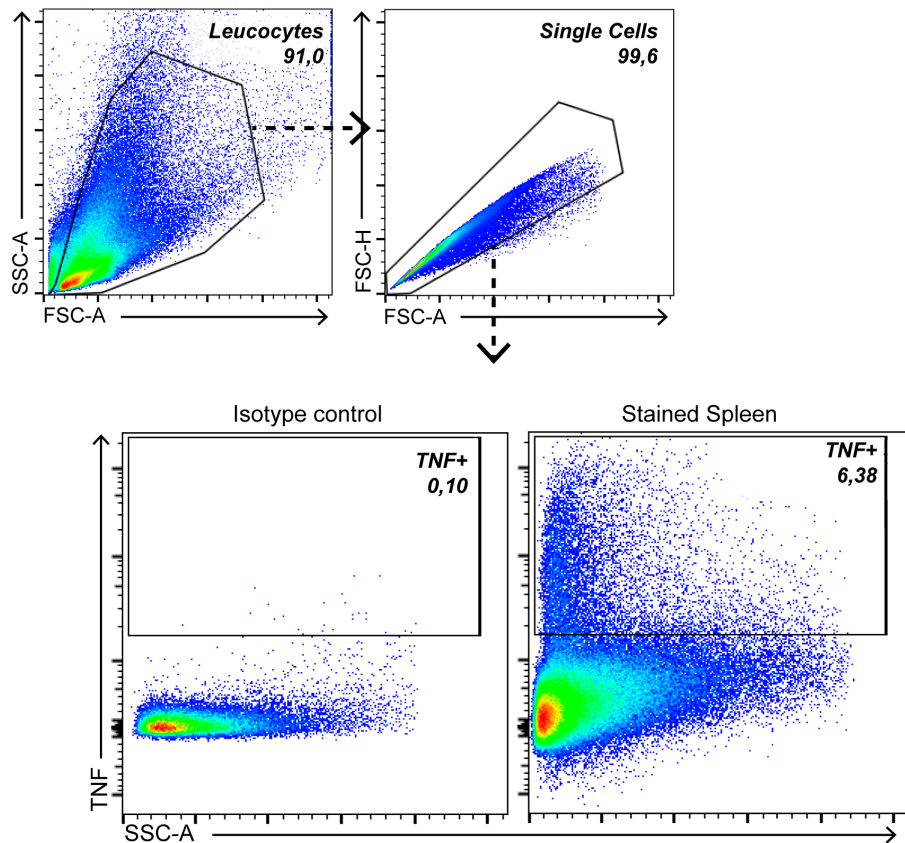

**Supplementary Figure 3: Gating strategies for TNF<sup>+</sup> cells in the spleen of *T. cruzi* infected muMT mice.**

Cells from the spleen of muMT mice infected with 10.000 trypomastigotes of *T. cruzi* were obtained at 15 Dpi and processed for flow cytometry to evaluate TNF-producing cells. Dot plots of SSC-A vs FSC-A and FSC-H vs FSC-A show the gate of single leucocytes analyzed. Dot plots of TNF vs SSC-A show the gate of TNF<sup>+</sup> single leucocytes.

## 1.4 Supplementary Figure 4

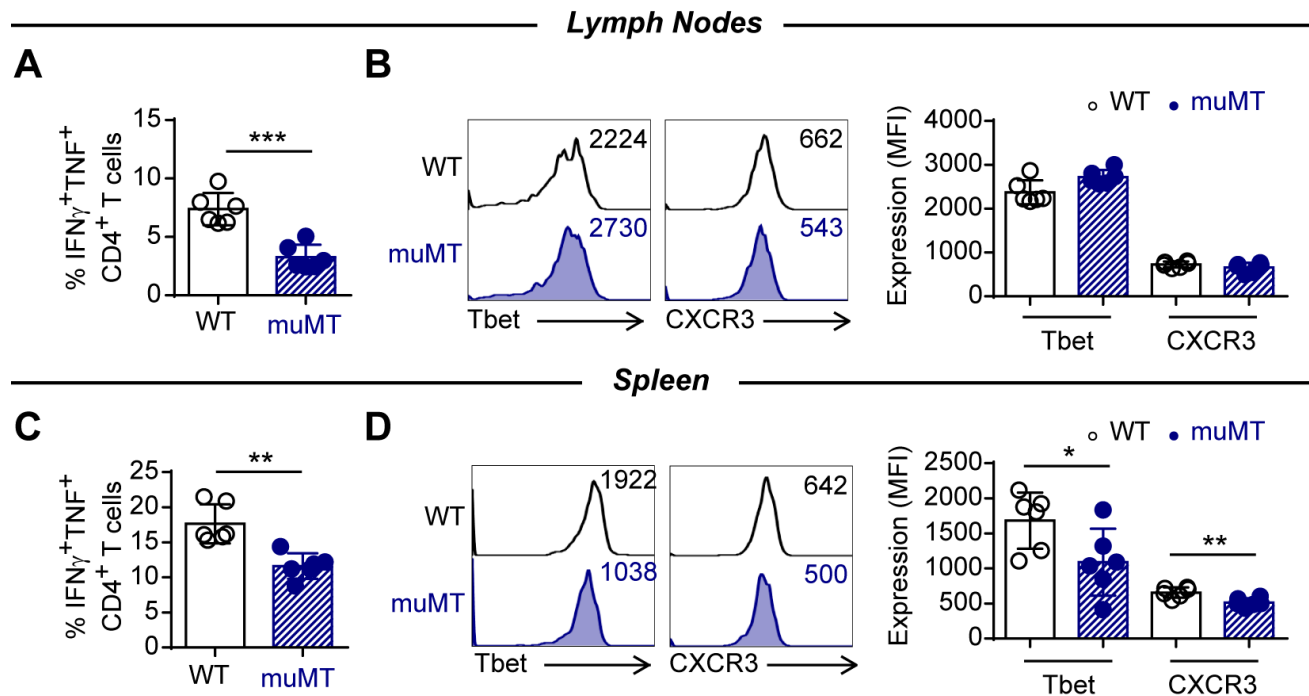

**Supplementary Figure 4: Frequency of polyfunctional IFN $\gamma$ <sup>+</sup>TNF<sup>+</sup>CD4<sup>+</sup> T cells in *T. cruzi* infected WT and muMT mice.**

(A, C) Percentage of IFN $\gamma$ <sup>+</sup>TNF<sup>+</sup> cells gated on CD4<sup>+</sup>CD3<sup>+</sup>T cells of (A) lymph nodes and (C) spleen from WT (n=6) and muMT (n=6) mice infected with 10000 trypomastigotes of *T. cruzi* obtained at 15 Dpi. Bars represent mean  $\pm$  SD of the percentage IFN $\gamma$ <sup>+</sup>TNF<sup>+</sup>CD4<sup>+</sup>CD3<sup>+</sup>T cells.

(B, D) Representative histograms and statistical analysis showing Tbet and CXCR3 expression on IFN $\gamma$ <sup>+</sup>TNF<sup>+</sup>CD4<sup>+</sup>CD3<sup>+</sup> T cells of (B) lymph nodes and (D) spleen from infected WT and muMT mice obtained at 15 Dpi. Bars represent mean  $\pm$  SD of the molecule expression on IFN $\gamma$ <sup>+</sup>TNF<sup>+</sup>CD4<sup>+</sup>CD3<sup>+</sup>, determined by geometric mean. Each symbol represents an individual mouse. (\*p<0.05, \*\*p<0.01, \*\*\*p<0.001; two-tailed t-Test).

## 1.5 Supplementary Figure 5

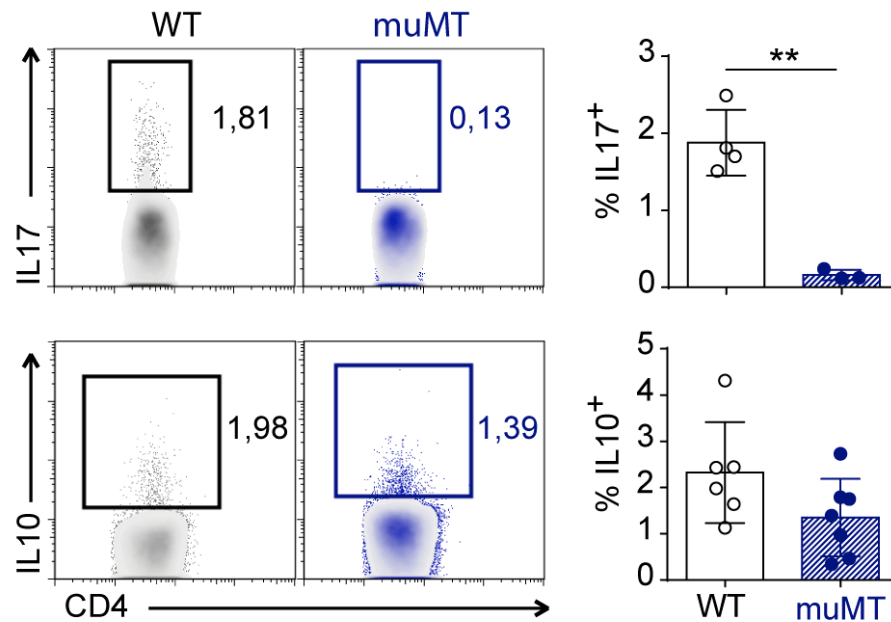

### Supplementary Figure 5: Frequency of IL-17- and IL-10 producing CD4<sup>+</sup> T cells in *T. cruzi* infected WT and muMT mice.

Representative dot plot showing IL-17 and IL-10 expression in CD4<sup>+</sup>CD3<sup>+</sup> T cells from the spleen of WT and muMT mice infected with 10000 trypomastigotes of *T. cruzi*, obtained at 15 Dpi; and statistical analysis. Bars represent means  $\pm$  SD of the percentage of IL-17<sup>+</sup>CD4<sup>+</sup>CD3<sup>+</sup> T cells or IL-10<sup>+</sup>CD4<sup>+</sup>CD3<sup>+</sup> T cells in infected WT (IL17: n=4; IL10: n=6) and muMT (IL17: n=3; IL10: n=7) mice (\*\*p<0.01 two-tailed t-Test).

## 1.6 Supplementary Figure 6

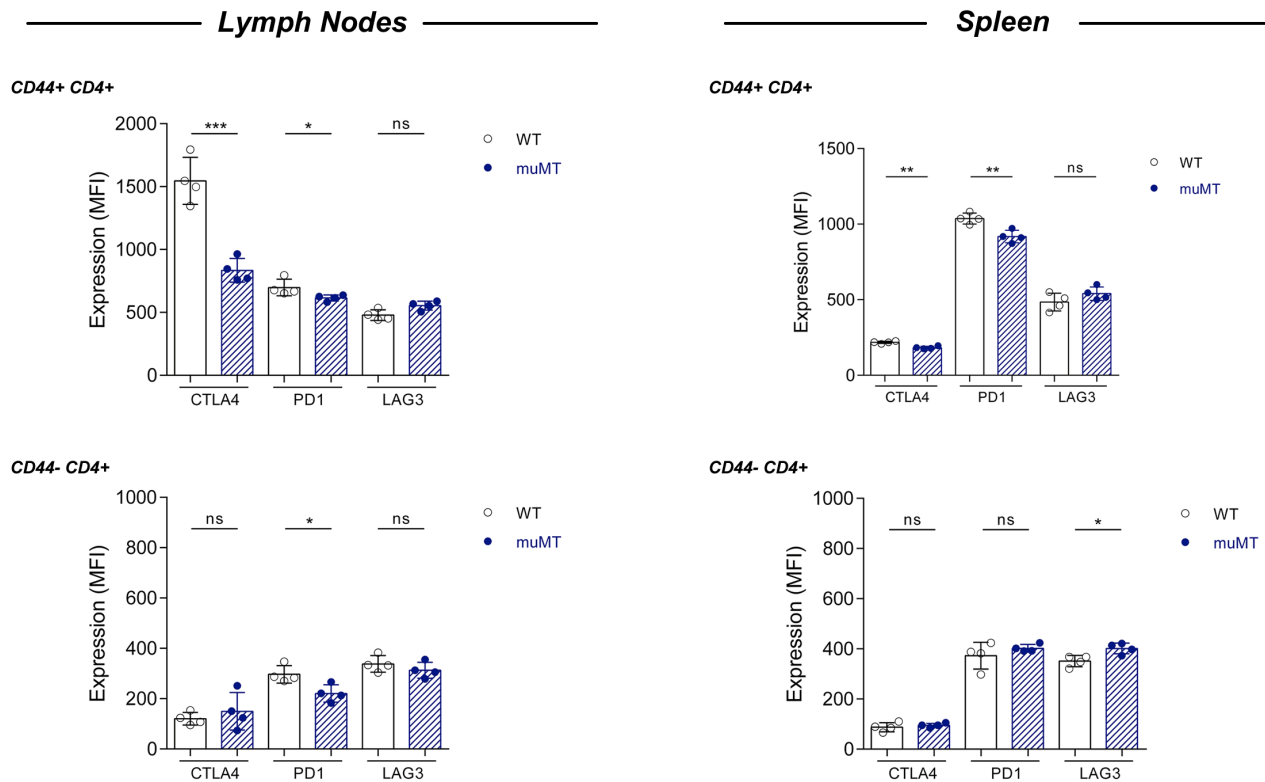

**Supplementary Figure 6: Expression of inhibitory receptors on activated CD44<sup>+</sup>CD4<sup>+</sup> T cells of *T. cruzi* infected WT and muMT mice**

Expression (MFI) of CTLA4, PD1 and LAG3 in gated Foxp3<sup>neg</sup>CD44<sup>+</sup>CD4<sup>+</sup>CD3<sup>+</sup>T cells in lymph nodes and spleen from *T. cruzi* infected WT and muMT mice obtained at 15 Dpi. Bars represent means  $\pm$  SD of the inhibitory receptor expression on Foxp3<sup>neg</sup>CD44<sup>+</sup>CD4<sup>+</sup>CD3<sup>+</sup>T cells. Each symbol represents an individual mouse. (\*p<0.05, \*\*p<0.01, \*\*\*p<0.001; ns, not significant, two-tailed t-Test). Experiment representative of two.
